# Supplementary material for: High-Sensitivity Real-Time Imaging of Dual Protein-Protein Interactions in Living Subjects Using Multicolor Luciferases
Source: PubMed Central journal article supplement (PMC2697115; doi:10.1371/journal.pone.0005868), 2009-06-12
Supplement: pone.0005868.s007.pdf [file pone.0005868.s007.pdf]

Table S2. Maximal bioluminescence intensities of complement luciferase fragments in the presence of rapamycin.

|                                      |        | N-terminal luciferase fragment |                             |                             |
|--------------------------------------|--------|--------------------------------|-----------------------------|-----------------------------|
|                                      |        | FLucN                          | ELucN                       | CBRN                        |
| C-terminal<br>luciferase<br>fragment | FLucC  | $(9.5 \pm 1.9) \times 10^3$    | $(2.9 \pm 0.6) \times 10^2$ | $(3.1 \pm 0.5) \times 10^2$ |
|                                      | ELucC  | $(1.3 \pm 0.3) \times 10^4$    | $(3.8 \pm 0.3) \times 10^3$ | $(1.8 \pm 0.1) \times 10^5$ |
|                                      | CBRC   | $(8.5 \pm 2.4) \times 10^2$    | $(1.4 \pm 0.2) \times 10^5$ | $(8.5 \pm 0.5) \times 10^5$ |
|                                      | McLuc1 | $(1.6 \pm 0.5) \times 10^5$    | $(1.7 \pm 2.0) \times 10^5$ | $(2.3 \pm 0.2) \times 10^5$ |
