# Supplementary material for: High-Sensitivity Real-Time Imaging of Dual Protein-Protein Interactions in Living Subjects Using Multicolor Luciferases
Source: PLoS One. 2009 Jun 12;4(6):e5868. doi: 10.1371/journal.pone.0005868 (PMC2697115; doi:10.1371/journal.pone.0005868)
Supplement: Table S1 — Comparison of the amino acid sequences between FLuc, CBR and ELuc. (0.20 MB PDF) [file pone.0005868.s006.pdf]

## Table S1 Ozawa et al.

### Comparison of the amino acid sequences between FLuc, CBR and ELuc.

|                                                                                                                                                                                                                                                                                      |                                                                                                                                                                                                                                                                                       |                                                                                                                                                                                                                                                                        |
|--------------------------------------------------------------------------------------------------------------------------------------------------------------------------------------------------------------------------------------------------------------------------------------|---------------------------------------------------------------------------------------------------------------------------------------------------------------------------------------------------------------------------------------------------------------------------------------|------------------------------------------------------------------------------------------------------------------------------------------------------------------------------------------------------------------------------------------------------------------------|
| 1st Amino Acid Sequence<br>File Name : PpyLuc<br>Sequence Size : 550                                                                                                                                                                                                                 | 1st Amino Acid Sequence<br>File Name : PpyLuc<br>Sequence Size : 550                                                                                                                                                                                                                  | 1st Amino Acid Sequence<br>File Name : ELuc<br>Sequence Size : 542                                                                                                                                                                                                     |
| 2nd Amino Acid Sequence<br>File Name : CBR<br>Sequence Size : 542                                                                                                                                                                                                                    | 2nd Amino Acid Sequence<br>File Name : ELuc<br>Sequence Size : 542                                                                                                                                                                                                                    | 2nd Amino Acid Sequence<br>File Name : CBR<br>Sequence Size : 542                                                                                                                                                                                                      |
| [48.8% / 543 aa]<br>1* MEDAKNIKKGPAPFYPLEDGTAGEQLHKAMKRYALVPGTIAFTDAHIEVDITYAEYFEM<br>** ** ** ** ** ** ** ** ** ** ** ** ** ** ** ** ** ** ** ** ** ** ** ** ** ** ** ** ** ** ** ** ** ** ** ** ** ** ** ** ** **<br>1* MVKREKNVYGPPELHPLEDLTAGEMLFRALRKHSHP--QALVDVVGDESLSYKEFFEA | [47.8% / 540 aa]<br>1* MEDAKNIKKGPAPFYPLEDGTAGEQLHKAMKRYALVPGTIAFTDAHIEVDITYAEYFEMS<br>** ** ** ** ** ** ** ** ** ** ** ** ** ** ** ** ** ** ** ** ** ** ** ** ** ** ** ** ** ** ** ** ** ** ** ** ** ** ** ** ** **<br>1* MEREKNVYGPPEKPLHGNFTAGEMLYNALHKHSHPQAI--LDVMGNESLSYQEFFDTT | [81.3% / 540 aa]<br>1* MEREKNVYGPPEKPLHGNFTAGEMLYNALHKHSHPQAILDVMGNESLSYQEFFDTTV<br>*** ** ** ** ** ** ** ** ** ** ** ** ** ** ** ** ** ** ** ** ** ** ** ** ** ** ** ** ** ** ** ** ** ** ** ** ** **<br>1* MVKREKNVYGPPELHPLEDLTAGEMLFRALRKHSHPQLVDVVGDESLSYKEFFEATV |
| 60* SVRLAEAMKRYGLNTNHRIVCSENSLQFFMPVLGALFIGAVAPANDIYNERELLNSMG<br>** ** ** ** ** ** ** ** ** ** ** ** ** ** ** ** ** ** ** ** ** ** **<br>59* TVLLAQSLHNCGYKMNDVSIACENNTFRFIPVIAAWYIGMIVAPVNESYIPDELCKVMG                                                                            | 61* VRLAEAMKRYGLNTNHRIVCSENSLQFFMPVLGALFIGAVAPANDIYNERELLNSMGI<br>** ** ** ** ** ** ** ** ** ** ** **<br>59* VKLGQSLQNCGYKMNDVSIACENNRFFIPIISAWYIGMIVAPVNESYIPDELCKVTGI                                                                                                               | 60* KLGQSLQNCGYKMNDVSIACENNRFFIPIISAWYIGMIVAPVNESYIPDELCKVTGIS<br>*** ** ** ** ** **<br>61* LLAQSLHNCGYKMNDVSIACENNTFRFIPVIAAWYIGMIVAPVNESYIPDELCKVMGIS                                                                                                                |
| 120* ISQPTVVFVSKKGLQKILNVQKLPKIIQKIMDSKTDYQGFQSMYFTVTSHPPGFNEY<br>** ** ** ** ** **<br>119* ISKPQIVFTTKNILNKVLEQSRTNFIKRIIILDTVENIHGCSLPNFI-SRYSGD-NIA                                                                                                                               | 121* SQPTVVFVSKKGLQKILNVQKLPKIIQKIMDSKTDYQGFQSMYFTVTSHPPGFNEYD<br>** ** ** ** **<br>119* SKPILVFTTRKILPKVLEVKDRTNFIKRIIILDEENLLGCESLHNFMSRYSDNNLQT--                                                                                                                                  | 120* KPILVFTTRKILPKVLEVKDRTNFIKRIIILDEENLLGCESLHNFMSRYSDNNLQTFKP<br>** ** ** **<br>121* KPQIVFTTKNILNKVLEQSRTNFIKRIIILDTVENIHGCSLPNFISRYSDGNIANFKP                                                                                                                     |
| 180* DFVPESFDRDKTIALIMNSSGSTGLPKGVALPHRTACVRFSHARDPIFGNQIIPDTAILS<br>** ** **<br>177* NFKPLHFDPVQVAAILCSSGTTGLPKGVMQTHQNICVRLIHALDPRYGTQLIPGVTVLV                                                                                                                                    | 181* FVPESFDRDKTIALIMNSSGSTGLPKGVALPHRTACVRFSHARDPIFGNQIIPDTAILSV<br>** ** **<br>177* FKPLHYDPVDQVAAILCSSGTTGLPKGVMQTHRNICVRLTHASDPRVGTQLIPGVSLAY                                                                                                                                     | 180* LHYPDVQVAAILCSSGTTGLPKGVMQTHRNICVRLTHASDPRVGTQLIPGVSLAYLPF<br>*** ** **<br>181* LHFDPVQVAAILCSSGTTGLPKGVMQTHQNICVRLIHALDPRYGTQLIPGVTVLVLPF                                                                                                                        |
| 240* VPFHHGFGMFTTLGYLICGFRWLVMYRFEELFLRSLQDYKIQSALLVPTLSFFAKST<br>** ** **<br>237* YLPFFHAFGHITLGYFMGLRVIMRRFDQEAFLKAIQDYEVRSVINVPVSLFSKSP                                                                                                                                           | 241* VPFHHGFGMFTTLGYLICGFRWLVMYRFEELFLRSLQDYKIQSALLVPTLSFFAKSTL<br>** ** **<br>237* LPFFHAFGSINLGYFMGLRVIMRRFNQEVFLKAIQDYEVRSVINVPSTILFSKSPSL                                                                                                                                         | 240* FHAFGSINLGYFMGLRVIMRRFNQEVFLKAIQDYEVRSVINVPSTILFSKSPLVDK<br>*****<br>241* FHAFGHITLGYFMGLRVIMRRFDQEAFLKAIQDYEVRSVINVPVSLFSKSPLVDK                                                                                                                                 |
| 300* LIDKYDLSNLHEIASGAPLSKEVGEAVAKRFLHPGIRQGYGLTETTSAILTPGDDKP<br>*****<br>297* LVDKYDLSLRELCGGAAPLAKEVAEVAAKRLNLPGIRCGFGLTESTSAIQTLDGFEKS                                                                                                                                           | 301* IDKYDLSNLHEIASGAPLSKEVGEAVAKRFLHPGIRQGYGLTETTSAILTPGDDKPG<br>*****<br>297* VDKYDLSLRELCGGAAPLAKEVAEIAVKRLNLPGIRCGYGLTESTSAINIHLHNEFKSG                                                                                                                                           | 300* YDLSTLAECCGAAPLAKEVAEIAVKRLNLPGIRCGYGLTESTSAINIHLHNEFKSGSLG<br>*****<br>301* YDLSLRELCGGAAPLAKEVAEVAAKRLNLPGIRCGFGLTESTSAIQTLDGFEKSGSLG                                                                                                                           |
| 360* GAVGVVPFFFAKVDLDTGKTLGVNQRGELCVRGPMIMSGYVNNPEATNALIDKGWLH<br>** ** **<br>357* GSLGRVTPLMAAKIADRETGKALGPNQVGELCKGPMVSKGYVNNPEATKEAIDDDGWLH                                                                                                                                       | 361* AVGVVPFFFAKVDLDTGKTLGVNQRGELCVRGPMIMSGYVNNPEATNALIDKGWLHS<br>** ** **<br>357* SLGVTPYMAAKIADRTNGEALGPNQVGELCIGWPMVTGKYVNNPQATKEAIDDDGWLHS                                                                                                                                        | 360* KVTPYMAAKIADRTNGEALGPNQVGELCIGWPMVTGKYVNNPQATKEAIDDDGWLHSGDF<br>*** ** **<br>361* RYTPLMAAKIADRETGKALGPNQVGELCKGPMVSKGYVNNPEATKEAIDDDGWLHSGDF                                                                                                                     |
| 420* SGDIAYWDEDEHFFVDRLSKLIYKGYQVAPAELESILLQHPNIFDAGVAGLPDDDAGE<br>*** ** **<br>417* SGDFGYDEDEHFFVDRYKELIYKGSQVAPAELEILLKNPCIRDVAVGIPDLEAGE                                                                                                                                         | 421* GDIAYWDEDEHFFVDRLSKLIYKGYQVAPAELESILLQHPNIFDAGVAGLPDDDAGEL<br>** ** **<br>417* GDFGYDEDEHFFVDRYKELIYKGYQVAPAELEILLQHPGIRDVAVGIPDIEAGEL                                                                                                                                           | 420* GYDEDEYFVDRYKELIYKGYQVAPAELEILLQHPGIRDVAVGIPDIEAGELPAG<br>*****<br>421* GYDEDEHFFVDRYKELIYKGSQVAPAELEILLKNPCIRDVAVGIPDLEAGELPSA                                                                                                                                   |
| 480* LPAAVVLEHGKTMTEKEIVDYASQVTTAKKLRGGVVFVDEPKGLTGKLDARK-IREI<br>** ** **<br>477* LPSAFVVKQPGTEITAKEVYDYLAEVSHTKYLRGGVRFVDSIPRNVTKGIRKELLKQL                                                                                                                                        | 481* PAAVVLEHGKTMTEKEIVDYASQVTTAKKLRGGVVFVDEPKGLTGKLDARKIRELI<br>** ** **<br>477* PAGFVVKQPGAQLTAKEVYDFLAQRVSHSKYLRGGVRFVDSIPRNVTKGISRKELREALM                                                                                                                                        | 480* FVKQPGAQLTAKEVYDFLAQRVSHSKYLRGGVRFVDSIPRNVTKGISRKELREALMEKA<br>*****<br>481* FVKQPGTEITAKEVYDYLAEVSHTKYLRGGVRFVDSIPRNVTKGIRKELLKQLLVKA                                                                                                                            |
| 539* LIAKKGGKIAV<br>**<br>537* LVKAGG                                                                                                                                                                                                                                                | 541* KAKKGGKIAV<br><br>537* EKASKL                                                                                                                                                                                                                                                    | 540* SKL<br>*<br>541* GG                                                                                                                                                                                                                                               |
